# Supplementary material
Source: MDPI journal article supplement (https://www.mdpi.com/2227-9717/10/1/49)
Supplement: s1 [file s1]

## **Supporting Information**

### **A spinel (FeNiCrMnMgAl)<sub>3</sub>O<sub>4</sub> high entropy oxide as a cycling stable anode material for Li-ion batteries**

Yu Zheng, Xin Wu, Xuexia Lan, and Renzong Hu\*

School of Materials Science and Engineering, Guangdong Provincial Key Laboratory of Advanced Energy Storage Mater., South China University of Technology, Guangzhou, 510640, China

\* Corresponding author: msrenzonghu@scut.edu.cn

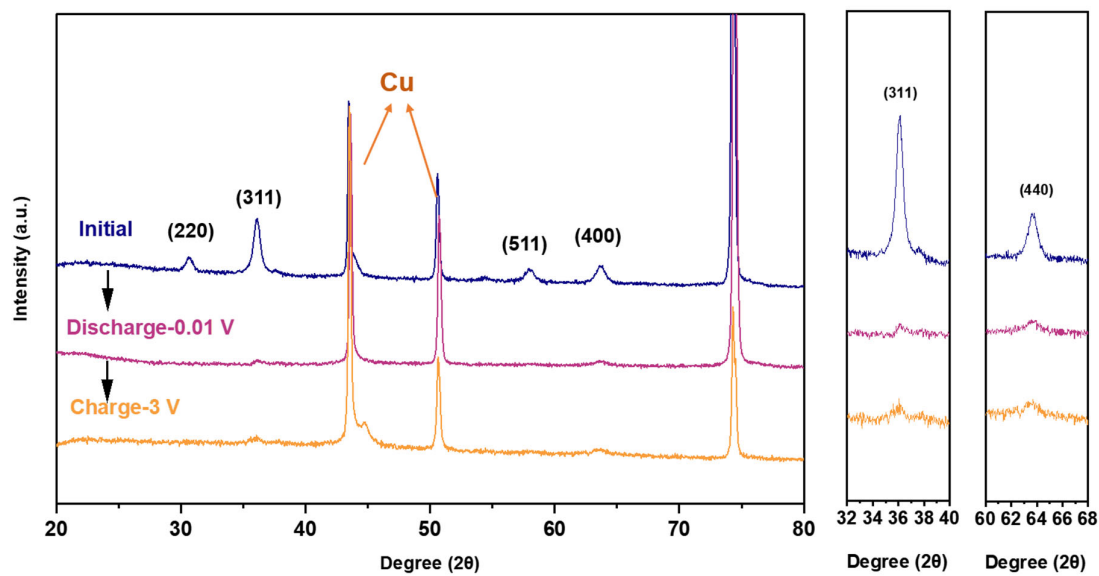

**Figure. S1** Evidence of spinel phase maintenance - Ex-situ XRD of  $(\text{FeNiCrMnMgAl})_3\text{O}_4$ .

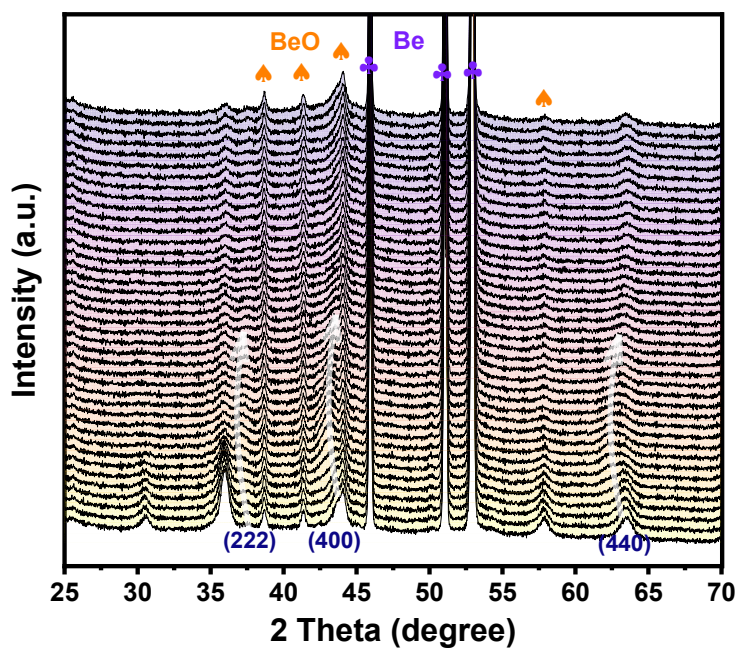

**Figure. S2** In-situ XRD of 6-SHEO anode recorded along the initial lithiation-delithiation and second delithiation process (stacking diagram version).

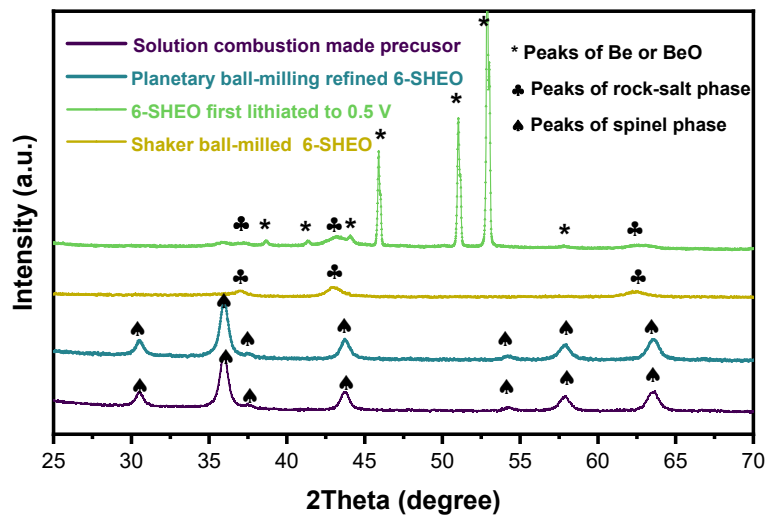

**Figure. S3** XRD information of solution combustion made  $(\text{FeNiCrMnMgAl})_3\text{O}_4$  precursor, planetary ball-milled refined 6-SHEO, 6-SHEO first lithiated to 0.5 V and shaker ball-milled 6-SHEO.
